# Supplementary material for: Xanthomonas euroxanthea sp. nov., a new xanthomonad species including pathogenic and non-pathogenic strains of walnut
Source: PubMed Central journal article supplement — Int J Syst Evol Microbiol. 2020 Sep 14;70(12):6024–31. doi: 10.1099/ijsem.0.004386 (PMC8049493; doi:10.1099/ijsem.0.004386), 2020-09-14
Supplement: ijsem-70-6024-s001.pdf [file ijsem-70-6024-s001.pdf]

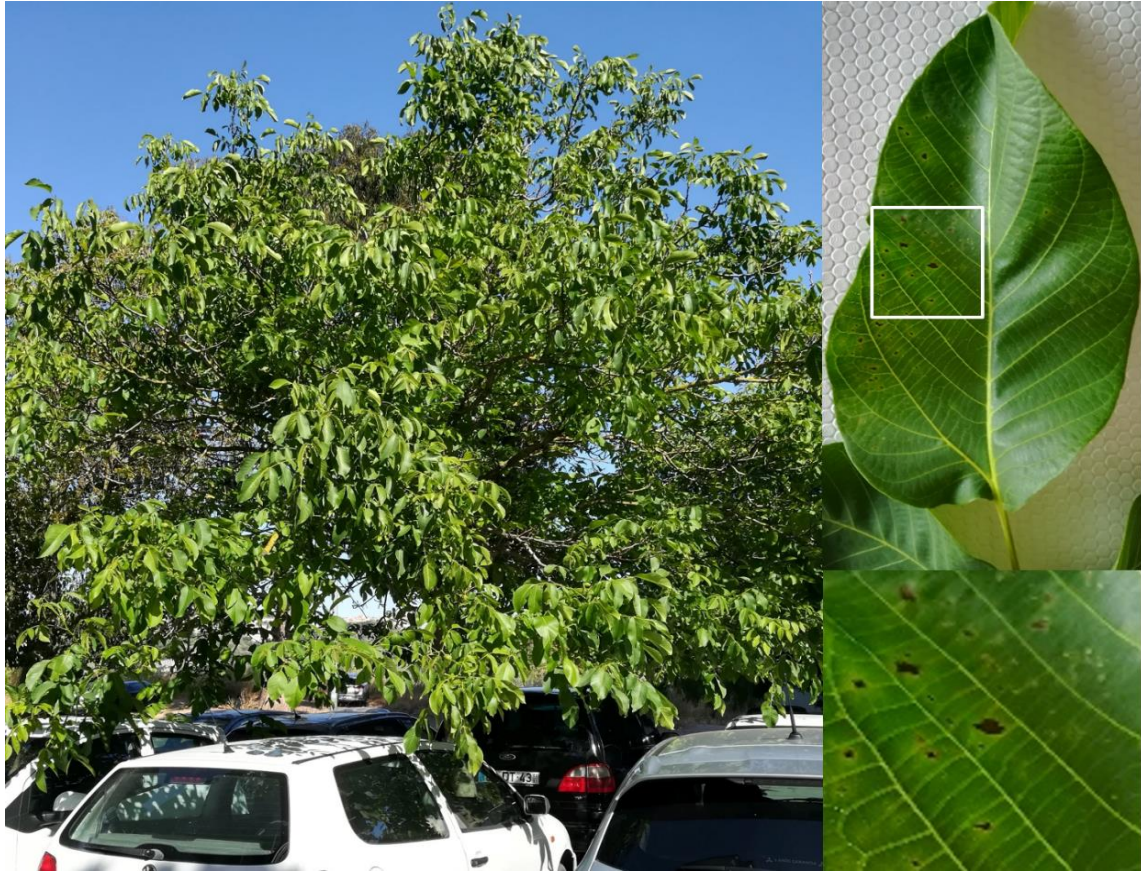

**Fig. S1. Ornamental walnut tree host from where isolates were recovered from. Detail of an infected leaf with a close-up of bacterial blight symptoms**

**Table S1. List of genomes used in ANI - EDGAR**

| Species                                       | Strain                   | Ref Seq           |
|-----------------------------------------------|--------------------------|-------------------|
| <i>X. campestris</i> pv. <i>campestris</i>    | ATCC 33913 <sup>T</sup>  | NC_003902         |
| <i>X. fragariae</i>                           | Fap21                    | NZ_CP016830       |
| <i>X. cassavae</i>                            | CFBP 4642 <sup>T</sup>   | NZ_CM002139       |
| <i>X. gardneri</i>                            | ICMP 7383                | NZ_CP018731       |
| <i>X. hortorum</i> pv. <i>carotae</i>         | M081                     | NZ_CM002307       |
| <i>X. citri</i> subsp. <i>citri</i>           | A306                     | NZ_CP006857       |
| <i>X. euvesicatoria</i>                       | LMG 930                  | NZ_CP018467       |
| <i>X. fuscans</i> subsp. <i>fuscans</i>       | 4834_R                   | NZ_FO681494       |
| <i>X. oryzae</i> pv. <i>oryzicola</i>         | CFBP2286 <sup>PT</sup>   | NZ_CP011962       |
| <i>X. prunicola</i>                           | CFBP 8353 <sup>T</sup>   | NZ_PHKX00000000   |
| <i>X. arboricola</i>                          | CITA 44                  | NZ_LJG00000000    |
| <i>X. arboricola</i> pv. <i>arracaciae</i>    | CFBP 7407 <sup>T</sup>   | NZ_MIGU00000000   |
| <i>X. arboricola</i> pv. <i>celebensis</i>    | NCPPB 1832 <sup>PT</sup> | NZ_JPHC00000000   |
| <i>X. arboricola</i> pv. <i>corylina</i>      | NCCB 100457              | NZ_APMC00000000   |
| <i>X. arboricola</i> pv. <i>juglandis</i>     | CFBP 2528 <sup>T</sup>   | NZ_JZEF00000000.1 |
| <i>X. arboricola</i> pv. <i>juglandis</i>     | NCPPB 1447               | NZ_AJTL00000000   |
| <i>X. arboricola</i> pv. <i>fragariae</i>     | LMG 19145 <sup>PT</sup>  | NZ_OEQL00000000   |
| <i>X. arboricola</i> pv. <i>populi</i>        | CFBP 3122                | NZ_MIGV00000000   |
| <i>X. arboricola</i> pv. <i>pruni</i>         | CFBP 3894 <sup>PT</sup>  | NZ_LOMI00000000   |
| <i>X. arboricola</i> pv. <i>zantedeschiae</i> | CFBP 7410 <sup>PT</sup>  | NZ_MIGW00000000   |

Abbreviations: ATCC, American Type Culture Collection, United States; CFBP, French Collection of Phytopathogenic Bacteria, France; ICMP, International Collection of Microorganisms from Plants, New Zealand; BCCM/ LMG, the Belgian Coordinated Collections of Microorganisms/ LMG Bacteria Collection in Gent, Belgium; CITA, Centro de Investigación y Tecnología Agroalimentaria de Aragón, Spain; NCPPB, National Collection of Plant Pathogenic Bacteria, United Kingdom; NCCB: Netherlands Culture Collection of Bacteria, Netherlands)

Table S2.% dDDH

| Query Genome                | Reference genome                                       | DDH  | Model C.I. (%) | Distance | Prob. DDH >70% | G+C difference |
|-----------------------------|--------------------------------------------------------|------|----------------|----------|----------------|----------------|
| <b><i>X. euroxantha</i></b> |                                                        |      |                |          |                |                |
| CPBF 424                    | <i>X. euroxantha</i> CPBF 367                          | 81.1 | 78.2 - 83.7    | 0.0221   | 91.37          | 0.08           |
| CPBF 424                    | <i>X. floridensis</i> WHRI 8848                        | 33.2 | 30.8 - 35.7    | 0.1262   | 0.36           | 0.44           |
| CPBF 424                    | <i>X. populi</i> CFBP 1817                             | 35.6 | 33.2 - 38.2    | 0.1155   | 0.8            | 2.5            |
| CPBF 424                    | <i>X. codiae</i> CFBP 4690                             | 32.6 | 30.2 - 35.1    | 0.1289   | 0.29           | 0.22           |
| CPBF 424                    | <i>X. albilineans</i> CFBP 2523                        | 21.8 | 19.6 - 24.2    | 0.2012   | 0              | 2.75           |
| CPBF 424                    | <i>X. alfalfae</i> subs. <i>citrumelonis</i> CFBP 3371 | 32.8 | 30.4 - 35.3    | 0.1281   | 0.31           | 0.86           |
| CPBF 424                    | <i>X. hortorum</i> CFBP 4925                           | 37.4 | 34.9-39.9      | 0.1088   | 1.34           | 1.98           |
| CPBF 424                    | <i>X. cynarae</i> CFBP 4188                            | 37.5 | 35-40          | 0.1085   | 1.38           | 2.1            |
| CPBF 424                    | <i>X. dyei</i> CFBP 7245                               | 32.8 | 30.4-35.3      | 0.128    | 0.31           | 1.54           |
| CPBF 424                    | <i>X. cucurbitae</i> CFBP 2542                         | 31.8 | 29.4-34.3      | 0.1328   | 0.21           | 0.38           |
| CPBF 424                    | <i>X. oryzae</i> ATCC 35993                            | 32.3 | 29.8-34.8      | 0.1306   | 0.26           | 1.89           |
| CPBF 424                    | <i>X. nasturtii</i> WHRI 8853                          | 34.1 | 31.6-36.6      | 0.1222   | 0.48           | 1.34           |
| CPBF 424                    | <i>X. bromi</i> LMG 947                                | 32.7 | 30.3-35.2      | 0.1284   | 0.3            | 1.75           |
| CPBF 424                    | <i>X. gardneri</i> ATCC 19865                          | 37.6 | 35.1-40.1      | 0.108    | 1.43           | 2.13           |
| CPBF 424                    | <i>X. cassavae</i> CFBP 4642                           | 33.6 | 31.2-36.1      | 0.1244   | 0.41           | 0.59           |
| CPBF 424                    | <i>X. arboricola</i> CFBP 2528                         | 49.4 | 46.7-52        | 0.0732   | 17.36          | 0.35           |
| CPBF 424                    | <i>X. vesicatoria</i> ATCC 35937                       | 32.6 | 30.2-35.1      | 0.1289   | 0.29           | 1.75           |
| CPBF 424                    | <i>X. pisi</i> DMS 18956                               | 33.7 | 31.2-36.2      | 0.124    | 0.42           | 1.09           |
| CPBF 424                    | <i>X. axonopodis</i> DSM 3585                          | 32.2 | 29.8-34.7      | 0.1307   | 0.25           | 1.33           |
| CPBF 424                    | <i>X. campestris</i> ATCC 33913                        | 31.1 | 28.7-33.6      | 0.1365   | 0.16           | 0.74           |
| CPBF 424                    | <i>X. citri</i> LMG 9322                               | 32.6 | 30.2-35.1      | 0.1288   | 0.29           | 1.06           |
| CPBF 367                    | <i>X. euroxantha</i> CPBF 424                          | 81.1 | 78.2-83.7      | 0.0221   | 91.37          | 0.08           |
| CPBF 367                    | <i>X. floridensis</i> WHRI 8848                        | 33.2 | 30.8-35.8      | 0.1259   | 0.36           | 0.52           |
| CPBF 367                    | <i>X. populi</i> CFBP 1817                             | 35.5 | 33.1-38        | 0.1161   | 0.77           | 2.58           |
| CPBF 367                    | <i>X. codiae</i> CFBP 4690                             | 32.8 | 30.4-35.3      | 0.1279   | 0.31           | 0.14           |
| CPBF 367                    | <i>X. albilineans</i> CFBP 2523                        | 22   | 19.8-24.5      | 0.199    | 0              | 2.83           |
| CPBF 367                    | <i>X. alfalfae</i> subs. <i>citrumelonis</i> CFBP 3371 | 32.7 | 30.2-35.2      | 0.1286   | 0.3            | 0.94           |
| CPBF 367                    | <i>X. hortorum</i> CFBP 4925                           | 37.2 | 34.8-39.7      | 0.1094   | 1.28           | 2.06           |
| CPBF 367                    | <i>X. cynarae</i> CFBP 4188                            | 37.2 | 34.7-39.7      | 0.1096   | 1.26           | 2.18           |
| CPBF 367                    | <i>X. dyei</i> CFBP 7245                               | 32.8 | 30.4-35.3      | 0.1279   | 0.31           | 1.62           |
| CPBF 367                    | <i>X. cucurbitae</i> CFBP 2542                         | 31.8 | 29.4-34.3      | 0.1328   | 0.22           | 0.46           |
| CPBF 367                    | <i>X. oryzae</i> ATCC 35993                            | 32.3 | 29.9-34.8      | 0.1303   | 0.26           | 1.97           |
| CPBF 367                    | <i>X. nasturtii</i> WHRI 8853                          | 34   | 31.6-36.5      | 0.1224   | 0.48           | 1.42           |
| CPBF 367                    | <i>X. bromi</i> LMG 947                                | 32.8 | 30.4-35.3      | 0.1279   | 0.31           | 1.84           |
| CPBF 367                    | <i>X. gardneri</i> ATCC 19865                          | 37.2 | 34.8-39.7      | 0.1093   | 1.29           | 2.21           |
| CPBF 367                    | <i>X. cassavae</i> CFBP 4642                           | 33.7 | 31.3-36.2      | 0.1236   | 0.43           | 0.67           |
| CPBF 367                    | <i>X. arboricola</i> CFBP 2528                         | 49.3 | 46.7-52        | 0.0732   | 17.33          | 0.43           |
| CPBF 367                    | <i>X. vesicatoria</i> ATCC 35937                       | 32.4 | 30-34.9        | 0.1298   | 0.27           | 1.83           |
| CPBF 367                    | <i>X. pisi</i> DMS 18956                               | 33.9 | 31.4-36.4      | 0.1231   | 0.45           | 1.17           |
| CPBF 367                    | <i>X. axonopodis</i> DSM 3585                          | 32.2 | 29.7-34.7      | 0.131    | 0.25           | 1.41           |
| CPBF 367                    | <i>X. campestris</i> ATCC 33913                        | 31.1 | 28.7-33.6      | 0.1361   | 0.17           | 0.82           |
| CPBF 367                    | <i>X. citri</i> LMG 9322                               | 32.6 | 30.2-35.1      | 0.1288   | 0.29           | 1.14           |

CPBF, Portuguese Collection of Phytopathogenic Bacteria, Portugal; CFBP, French Collection of Phytopathogenic Bacteria, France; ATCC, American Type Culture Collection, United States; DSM, German Collection of Microorganisms and Cell Cultures GmbH, Germany; BCCM/ LMG, the Belgian Coordinated Collections of Microorganisms/ LMG Bacteria Collection in Gent, Belgium
